# Supplementary material for: Dalea: A Persistent Multi-Level Extendible Hashing with Improved Tail Performance
Source: Springer Nature journal article supplement (doi:10.1007/s11390-023-2957-8), 2023-09-01
Supplement: 11390_2023_2957_MOESM1_ESM.pdf [file 11390_2023_2957_MOESM1_ESM.pdf]

Xiong ZW, Jiang DJ, Xiong J *et al.* Dalea: A persistent multi-level extendible hashing with improved tail performance. JOURNAL OF COMPUTER SCIENCE AND TECHNOLOGY 38(5): 1051–1073 Sept. 2023. DOI: 10.1007/s11390-023-2957-8

# Dalea: A Persistent Multi-Level Extendible Hashing with Improved Tail Performance

Zi-Wei Xiong (熊子威), De-Jun Jiang(蒋德钧), Jin Xiong(熊劲),  
Ren Ren(任仁)

# Research Objectives

- Existing persistent hashing working on persistent memory targets achieving high average performance.
- Tail performance is also important but is not well optimized by existing works.

# Research Method

- Tail performance is significantly determined by rehashing granularity and concurrency.
- We propose multi-level extendible hashing to enable fine-grained rehashing without sacrificing average performance.
- We use volatile locks to further improve tail performance.

# Research Results

- Dalea is able to achieve 4.1x higher tail throughput and 5.4x lower tail latency.

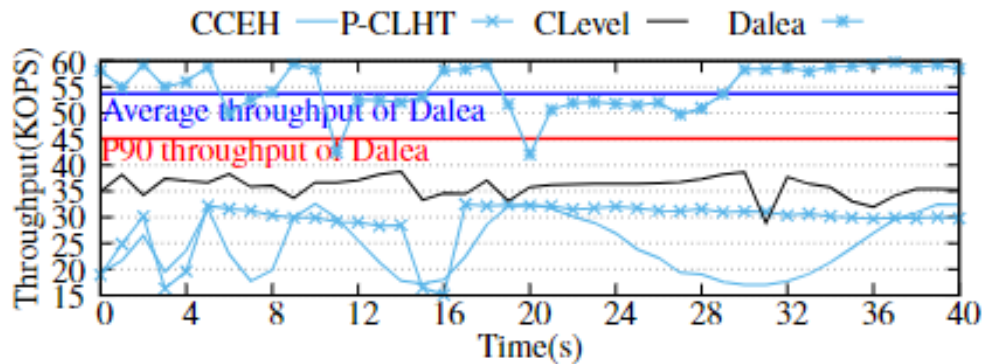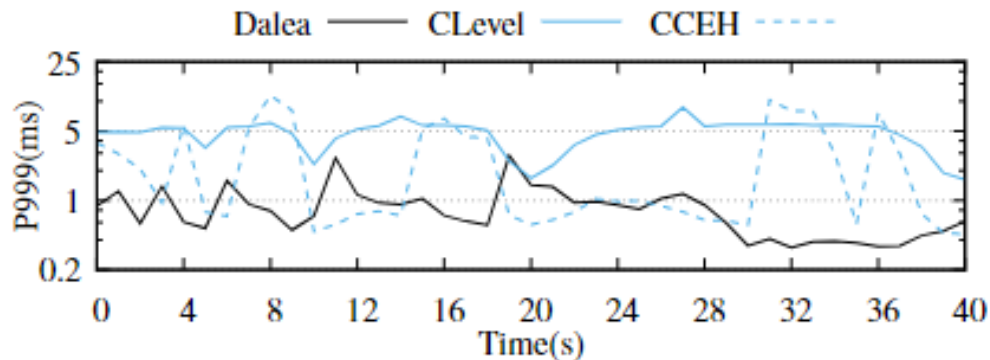

# Research Conclusions

- Fine-grained rehashing can greatly improve tail latency.
- Volatile locks can improve both tail throughput and tail latency.
- Fingerprinting mainly benefits average performance instead of tail performance.
